# Supplementary material
Source: ML conference proceedings conference paper supplement (https://proceedings.neurips.cc/paper_files/paper/2016/hash/854d6fae5ee42911677c739ee1734486-Abstract.html)
Supplement: Supplementary file 1 [file 854d6fae5ee42911677c739ee1734486-Supplemental.zip]

Archive with 1 entries (1 files):
- nonnegative_supp.pdf
